# Supplementary material for: Robust, coherent, and synchronized circadian clock-controlled oscillations along Anabaena filaments
Source: eLife journal article supplement (doi:10.7554/elife.64348), 2021-03-22
Supplement: supp [file elife-64348-supp-v1.zip]

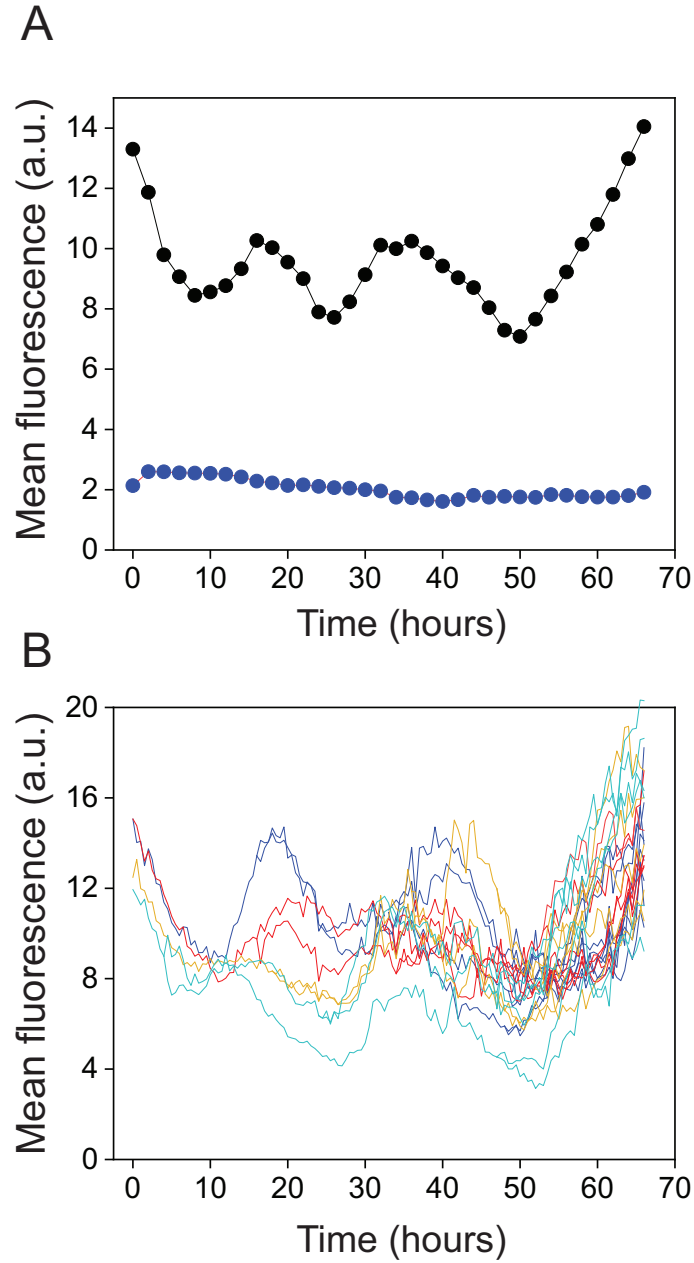

Figure 2 – figure supplement 1: **Effects of perturbation of cell-cell communication on the expression of  $P_{pecB-gfp}$ .** (A) Average cell fluorescence intensity from  $P_{pecB-gfp}$  in a filament of a  $\Delta sepJ/\Delta fraCD$  *Anabaena* strain as a function of time (full black circles); Intensity of autofluorescence as a function of time (blue circles). Data were taken from at least 30 contiguous cells along a filament. (B) Expression from a  $P_{pecB-gfp}$  fusion in the lineages of four (color coded) contiguous cells as a function of time.
