# Supplementary material for: Robust, coherent, and synchronized circadian clock-controlled oscillations along Anabaena filaments
Source: eLife journal article supplement (doi:10.7554/elife.64348), 2021-03-22
Supplement: supp [file elife-64348-supp-v1.zip]

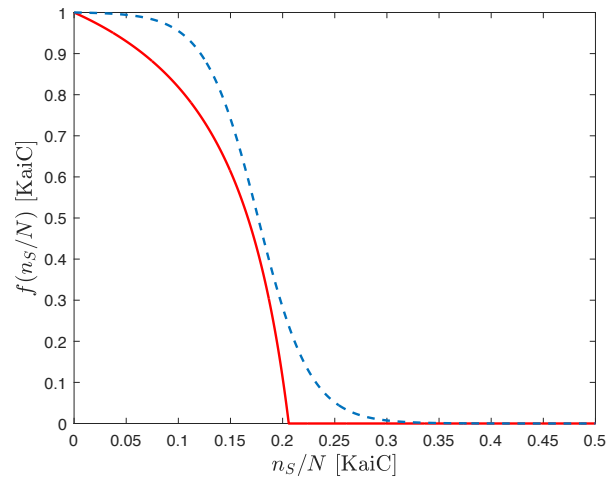

Figure 5 – figure supplement 1: **Typical shape of the nonlinear function  $f$ .** The blue dashed line is the plot of Appendix 1 Eq. (6) with  $\gamma = 14$  and  $[\text{KaiA}]=1.2$  while the red solid line denotes the function used in (Rust et al., 2007). Both curves have been normalized by  $f(0)$ .
